# Supplementary material for: Functions of innate and acquired immune system are reduced in domestic pigeons (Columba livia domestica) given a low protein diet
Source: PubMed Central journal article supplement (PMC4821251; doi:10.1098/rsos.150408), 2016-03-23
Supplement: rsos150408supp2.pdf [file rsos150408supp2.pdf]

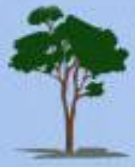

## Diet SF11-068

## 6% Protein Pigeon Pellets

A low protein Semi pure diet for pigeons based on customer specifications

| Calculated Nutritional Parameters                 |            |
|---------------------------------------------------|------------|
| Protein                                           | 6.00%      |
| Total Fat                                         | 4.20%      |
| Crude Fibre                                       | 4.70%      |
| Acid Detergent Fibre                              | 4.70%      |
| Metabolisable Energy                              | 15 MJ / Kg |
| % Total Calculated Digestible Energy From Protein | 7.90%      |
| % Total Calculated Digestible Energy From Lipids  | 9.80%      |

| Diet Form and Features                                                                                                                                                                                                                               |
|------------------------------------------------------------------------------------------------------------------------------------------------------------------------------------------------------------------------------------------------------|
| <ul style="list-style-type: none"> <li>The diet is manufactured as an 4 mm diameter cube 10 - 30 mm long.</li> <li>Packaging is in 5Kg oxygen impermeable bags under nitrogen, placed in cardboard cartons for protection during transit.</li> </ul> |

| Feeding Recommendations                                                                         |
|-------------------------------------------------------------------------------------------------|
| This diet should be introduced gradually into the animals ration over at least a 14 day period. |

| Ingredients                    |           |
|--------------------------------|-----------|
| Starch                         | 765 g/Kg  |
| Soy Protein Isolate            | 61 g/Kg   |
| Cellulose                      | 50 g/Kg   |
| Soya Bean Oil                  | 40 g/Kg   |
| Mono Calcium Phosphate         | 20.7 g/Kg |
| Calcium Carbonate              | 14.8 g/Kg |
| Potassium Dihydrogen Phosphate | 10 g/Kg   |
| Pigeon Vitamins                | 10 g/Kg   |
| Salt                           | 6 g/Kg    |
| DL Methionine                  | 6 g/Kg    |
| Lysine                         | 5 g/Kg    |
| Choline Chloride 60%           | 5 g/Kg    |
| Glycine                        | 4 g/Kg    |
| Pigeon Trace Minerals          | 1.6 g/Kg  |
| Potassium Chloride             | 1 g/Kg    |

| Calculated Amino Acids |       |
|------------------------|-------|
| Valine                 | 0.24% |
| Leucine                | 0.43% |
| Isoleucine             | 0.24% |
| Threonine              | 0.20% |
| Methionine             | 0.66% |
| Cystine                | 0.06% |
| Lysine                 | 0.72% |
| Phenylalanine          | 0.28% |
| Tyrosine               | 0.21% |
| Tryptophan             | 0.06% |

| Calculated Total Minerals |           |
|---------------------------|-----------|
| Calcium                   | 0.86%     |
| Phosphorous               | 0.79%     |
| Magnesium                 | 0.04%     |
| Sodium                    | 0.34%     |
| Potassium                 | 0.37%     |
| Sulphur                   | 0.19%     |
| Iron                      | 290 mg/Kg |
| Copper                    | 11 mg/Kg  |
| Iodine                    | 1.7 mg/Kg |
| Manganese                 | 106 mg/Kg |
| Cobalt                    | 1.2 mg/Kg |
| Zinc                      | 170 mg/Kg |
| Molybdenum                | 4.7 mg/Kg |
| Selenium                  | 0.1 mg/Kg |
| Cadmium                   | No data   |

| Calculated Total Vitamins        |             |
|----------------------------------|-------------|
| Vitamin A (Retinol)              | 4 500 IU/Kg |
| Vitamin D (Cholecalciferol)      | 450 IU/Kg   |
| Vitamin E (a Tocopherol acetate) | 52 mg/Kg    |
| Vitamin K (Menadione)            | 1.5 mg/Kg   |
| Vitamin C (Ascorbic acid)        | 150 mg/Kg   |
| Vitamin B1 (Thiamine)            | 15 mg/Kg    |
| Vitamin B2 (Riboflavin)          | 15 mg/Kg    |
| Niacin (Nicotinic acid)          | 51 mg/Kg    |
| Vitamin B6 (Pryridoxine)         | 7.8 mg/Kg   |
| Pantothenic Acid                 | 20 mg/Kg    |
| Biotin                           | 600 ug/Kg   |
| Folic Acid                       | 6.1 mg/Kg   |
| Inositol                         | 0.3 mg/Kg   |
| Vitamin B12 (Cyanocobalamin)     | 16.5 ug/Kg  |
| Choline                          | 3 220 mg/Kg |

| Calculated Fatty Acid Composition |       |
|-----------------------------------|-------|
| Myristic Acid 14:0                | Trace |
| Palmitic Acid 16:0                | 0.40% |
| Stearic Acid 18:0                 | 0.15% |
| Oleic Acid 18:1                   | 0.90% |
| Gadoleic Acid 20:1                | 0.01% |
| Linoleic Acid 18:2 n6             | 2.04% |
| a Linolenic Acid 18:3 n3          | 0.27% |
| Total n3                          | 0.27% |
| Total n6                          | 2.04% |
| Total Mono Unsaturated Fats       | 0.93% |
| Total Poly Unsaturated Fats       | 2.31% |
| Total Saturated Fats              | 0.57% |

Calculated data uses information from typical raw material composition. It could be expected that individual batches of diet will vary from this figure.

We are happy to provide full calculated nutritional information for all of our products, however we would like to emphasise that these diets have been specifically designed for manufacture by Specialty Feeds.

**This Feedstuffs does not contain restricted animal material.**



## Diet SF11-069

## 10% Protein Pigeon Pellets

A medium protein semi pure diet for pigeons based on customer specifications

| Calculated Nutritional Parameters                 |            |
|---------------------------------------------------|------------|
| Protein                                           | 10.00%     |
| Total Fat                                         | 4.40%      |
| Crude Fibre                                       | 4.70%      |
| Acid Detergent Fibre                              | 4.70%      |
| Metabolisable Energy                              | 15 MJ / Kg |
| % Total Calculated Digestible Energy From Protein | 12.90%     |
| % Total Calculated Digestible Energy From Lipids  | 9.80%      |

| Diet Form and Features                                                                                                                                                                                                                                              |
|---------------------------------------------------------------------------------------------------------------------------------------------------------------------------------------------------------------------------------------------------------------------|
| <ul style="list-style-type: none"> <li>The diet is manufactured as an 4 mm diameter cube 10 - 30 mm long.</li> <li>Packaging is in 5kg oxygen impermeable bags, vacuum sealed under nitrogen, placed in cardboard cartons for protection during transit.</li> </ul> |

| Feeding Recommendations                                                                         |
|-------------------------------------------------------------------------------------------------|
| This diet should be introduced gradually into the animals ration over at least a 14 day period. |

| Ingredients                    |           |
|--------------------------------|-----------|
| Starch                         | 725 g/Kg  |
| Soy Protein Isolate            | 101 g/Kg  |
| Cellulose                      | 50 g/Kg   |
| Soya Bean Oil                  | 40 g/Kg   |
| Mono Calcium Phosphate         | 20.7 g/Kg |
| Calcium Carbonate              | 14.8 g/Kg |
| Potassium Dihydrogen Phosphate | 10 g/Kg   |
| Pigeon Vitamins                | 10 g/Kg   |
| Salt                           | 6 g/Kg    |
| DL Methionine                  | 6 g/Kg    |
| Lysine                         | 5 g/Kg    |
| Choline Chloride 60%           | 5 g/Kg    |
| Glycine                        | 4 g/Kg    |
| Pigeon Trace Minerals          | 1.6 g/Kg  |
| Potassium Chloride             | 1 g/Kg    |

| Calculated Amino Acids |       |
|------------------------|-------|
| Valine                 | 0.44% |
| Leucine                | 0.76% |
| Isoleucine             | 0.44% |
| Threonine              | 0.36% |
| Methionine             | 0.72% |
| Cystine                | 0.10% |
| Lysine                 | 1.00% |
| Phenylalanine          | 0.50% |
| Tyrosine               | 0.40% |
| Tryptophan             | 0.10% |

| Calculated Total Minerals |           |
|---------------------------|-----------|
| Calcium                   | 0.90%     |
| Phosphorous               | 0.80%     |
| Magnesium                 | 0.04%     |
| Sodium                    | 0.40%     |
| Potassium                 | 0.40%     |
| Sulphur                   | 0.20%     |
| Iron                      | 290 mg/Kg |
| Copper                    | 11 mg/Kg  |
| Iodine                    | 1.7 mg/Kg |
| Manganese                 | 106 mg/Kg |
| Cobalt                    | 1.2 mg/Kg |
| Zinc                      | 170 mg/Kg |
| Molybdenum                | 4.7 mg/Kg |
| Selenium                  | 0.1 mg/Kg |

| Calculated Total Vitamins        |             |
|----------------------------------|-------------|
| Vitamin A (Retinol)              | 4 500 IU/Kg |
| Vitamin D (Cholecalciferol)      | 450 IU/Kg   |
| Vitamin E (a Tocopherol acetate) | 52 mg/Kg    |
| Vitamin K (Menadione)            | 1.5 mg/Kg   |
| Vitamin C (Ascorbic acid)        | 150 mg/Kg   |
| Vitamin B1 (Thiamine)            | 15 mg/Kg    |
| Vitamin B2 (Riboflavin)          | 15 mg/Kg    |
| Niacin (Nicotinic acid)          | 50 mg/Kg    |
| Vitamin B6 (Pryridoxine)         | 7.8 mg/Kg   |
| Pantothenic Acid                 | 20 mg/Kg    |
| Biotin                           | 600 ug/Kg   |
| Folic Acid                       | 6 mg/Kg     |
| Inositol                         | 0.3 mg/Kg   |
| Vitamin B12 (Cyanocobalamin)     | 20 ug/Kg    |
| Choline                          | 3 220 mg/Kg |

| Calculated Fatty Acid Composition |       |
|-----------------------------------|-------|
| Myristic Acid 14:0                | Trace |
| Palmitic Acid 16:0                | 0.40% |
| Stearic Acid 18:0                 | 0.15% |
| Oleic Acid 18:1                   | 0.90% |
| Gadoleic Acid 20:1                | 0.01% |
| Linoleic Acid 18:2 n6             | 2.04% |
| a Linolenic Acid 18:3 n3          | 0.27% |
| Total n3                          | 0.27% |
| Total n6                          | 2.04% |
| Total Mono Unsaturated Fats       | 0.93% |
| Total Poly Unsaturated Fats       | 2.31% |
| Total Saturated Fats              | 0.57% |

Calculated data uses information from typical raw material composition. It could be expected that individual batches of diet will vary from this figure.

We are happy to provide full calculated nutritional information for all of our products, however we would like to emphasise that these diets have been specifically designed for manufacture by Specialty Feeds.

**This Feedstuffs does not contain restricted animal material.**



## Diet SF11-070

## 14% Protein Pigeon Pellets

A medium protein semi pure diet for pigeons based on customer specifications

| Calculated Nutritional Parameters                 |            |
|---------------------------------------------------|------------|
| Protein                                           | 14.00%     |
| Total Fat                                         | 4.40%      |
| Crude Fibre                                       | 4.70%      |
| Acid Detergent Fibre                              | 4.70%      |
| Metabolisable Energy                              | 15 MJ / Kg |
| % Total Calculated Digestible Energy From Protein | 17.80%     |
| % Total Calculated Digestible Energy From Lipids  | 9.70%      |

### Diet Form and Features

- The diet is manufactured as an 4 mm diameter cube 10 - 30 mm long.
- Packaging is in 5kg oxygen impermeable bags, vacuum sealed under nitrogen, placed in cardboard cartons for protection during transit.

### Feeding Recommendations

This diet should be introduced gradually into the animals ration over at least a 14 day period.

| Ingredients                    |           |
|--------------------------------|-----------|
| Starch                         | 680 g/Kg  |
| Soy Protein Isolate            | 146 g/Kg  |
| Cellulose                      | 50 g/Kg   |
| Soya Bean Oil                  | 40 g/Kg   |
| Mono Calcium Phosphate         | 20.7 g/Kg |
| Calcium Carbonate              | 14.8 g/Kg |
| Potassium Dihydrogen Phosphate | 10 g/Kg   |
| Pigeon Vitamins                | 10 g/Kg   |
| Salt                           | 6 g/Kg    |
| DL Methionine                  | 6 g/Kg    |
| Lysine                         | 5 g/Kg    |
| Choline Chloride 60%           | 5 g/Kg    |
| Glycine                        | 4 g/Kg    |
| Pigeon Trace Minerals          | 1.6 g/Kg  |
| Potassium Chloride             | 1 g/Kg    |

| Calculated Amino Acids |       |
|------------------------|-------|
| Valine                 | 0.63% |
| Leucine                | 1.09% |
| Isoleucine             | 0.63% |
| Threonine              | 0.52% |
| Methionine             | 0.78% |
| Cystine                | 0.14% |
| Lysine                 | 1.24% |
| Phenylalanine          | 0.70% |
| Tyrosine               | 0.50% |
| Tryptophan             | 0.15% |

| Calculated Total Minerals |           |
|---------------------------|-----------|
| Calcium                   | 0.90%     |
| Phosphorous               | 0.80%     |
| Magnesium                 | 0.04%     |
| Sodium                    | 0.40%     |
| Potassium                 | 0.40%     |
| Sulphur                   | 0.20%     |
| Iron                      | 290 mg/Kg |
| Copper                    | 11 mg/Kg  |
| Iodine                    | 1.7 mg/Kg |
| Manganese                 | 106 mg/Kg |
| Cobalt                    | 1.2 mg/Kg |
| Zinc                      | 170 mg/Kg |
| Molybdenum                | 4.7 mg/Kg |
| Selenium                  | 0.1 mg/Kg |

| Calculated Total Vitamins        |             |
|----------------------------------|-------------|
| Vitamin A (Retinol)              | 4 500 IU/Kg |
| Vitamin D (Cholecalciferol)      | 450 IU/Kg   |
| Vitamin E (a Tocopherol acetate) | 52 mg/Kg    |
| Vitamin K (Menadione)            | 1.5 mg/Kg   |
| Vitamin C (Ascorbic acid)        | 150 mg/Kg   |
| Vitamin B1 (Thiamine)            | 15 mg/Kg    |
| Vitamin B2 (Riboflavin)          | 15 mg/Kg    |
| Niacin (Nicotinic acid)          | 50 mg/Kg    |
| Vitamin B6 (Pryridoxine)         | 7.8 mg/Kg   |
| Pantothenic Acid                 | 20 mg/Kg    |
| Biotin                           | 600 ug/Kg   |
| Folic Acid                       | 6 mg/Kg     |
| Inositol                         | 0.3 mg/Kg   |
| Vitamin B12 (Cyanocobalamin)     | 20 ug/Kg    |
| Choline                          | 3 220 mg/Kg |

| Calculated Fatty Acid Composition |       |
|-----------------------------------|-------|
| Myristic Acid 14:0                | Trace |
| Palmitic Acid 16:0                | 0.40% |
| Stearic Acid 18:0                 | 0.15% |
| Oleic Acid 18:1                   | 0.90% |
| Gadoleic Acid 20:1                | 0.01% |
| Linoleic Acid 18:2 n6             | 2.04% |
| a Linolenic Acid 18:3 n3          | 0.27% |
| Total n3                          | 0.27% |
| Total n6                          | 2.04% |
| Total Mono Unsaturated Fats       | 0.93% |
| Total Poly Unsaturated Fats       | 2.31% |
| Total Saturated Fats              | 0.57% |

Calculated data uses information from typical raw material composition. It could be expected that individual batches of diet will vary from this figure.

We are happy to provide full calculated nutritional information for all of our products, however we would like to emphasise that these diets have been specifically designed for manufacture by Specialty Feeds.

**This Feedstuffs does not contain restricted animal material.**
